# Supplementary material for: A voice for the patients: Evaluation of the implementation of a strategic organizational committee for patient engagement in mental health
Source: PLOS journal article supplement (doi:10.1371/journal.pone.0205173), 2018-10-24
Supplement: S1 (10.1371/journal.pone.0205173.s001) [file journal.pone.0205173.s001]

# S1 Appendix. The implementation process of the committee and influencing factors.

|                                                                                 | AGENDA-SETTING                                                                                                                                                                                                                               | MATCHING                                                                                                                                                                                                                                                                  | REDEFINING/RESTRUCTURING                                                                                                                                                                                                                                                                                                                                                 | CLARIFYING                                                                                                                                                                                                                                                                                                                                                 | ROUTINIZING                                                                                                                                       |
|---------------------------------------------------------------------------------|----------------------------------------------------------------------------------------------------------------------------------------------------------------------------------------------------------------------------------------------|---------------------------------------------------------------------------------------------------------------------------------------------------------------------------------------------------------------------------------------------------------------------------|--------------------------------------------------------------------------------------------------------------------------------------------------------------------------------------------------------------------------------------------------------------------------------------------------------------------------------------------------------------------------|------------------------------------------------------------------------------------------------------------------------------------------------------------------------------------------------------------------------------------------------------------------------------------------------------------------------------------------------------------|---------------------------------------------------------------------------------------------------------------------------------------------------|
| <b>Content of implementation process</b>                                        | <p>Elaboration of patient engagement within one department (policy, compensation, etc.)</p> <p>Training for participation</p> <p>Creation of self-help group</p> <p>Introduction of citizen psychiatry (CP) and recovery (R) combination</p> | <p>Organization of civic forum</p> <p>Field research visits to explore recovery and citizenship psychiatry (France inspiring)</p> <p>Conceptualization of full citizenship vision</p> <p>Mandate assigned for realization of patient engagement within the new vision</p> | <p>Establishment of committee for patient engagement</p> <p>Researcher and member of initiating department as first members (chairs)</p> <p>Inclusion of several departments, the user committee, two patient partners (one as coordinator)</p> <p>Change of chairperson</p> <p>Elaboration of mandate and role of committee</p> <p>Budget from executive management</p> | <p>Elaboration of centralized system:</p> <ul style="list-style-type: none"> <li>- Formal policy and procedures</li> <li>- Request form</li> <li>- Compensation form</li> <li>- Tracking mechanism</li> </ul> <p>Reflection on functioning participation</p> <p>Removal of discriminating organizational structures</p> <p>Communication and promotion</p> | <p>Ongoing application of procedures</p> <p>Creation of evaluation mechanism</p> <p>Increased participation (activities and patient partners)</p> |
| <b>Organizational and environmental factors (facilitating (+)/limiting (-))</b> | Executive management support (+)                                                                                                                                                                                                             |                                                                                                                                                                                                                                                                           |                                                                                                                                                                                                                                                                                                                                                                          |                                                                                                                                                                                                                                                                                                                                                            |                                                                                                                                                   |
|                                                                                 | Collaboration with self-help group (+)                                                                                                                                                                                                       |                                                                                                                                                                                                                                                                           |                                                                                                                                                                                                                                                                                                                                                                          |                                                                                                                                                                                                                                                                                                                                                            |                                                                                                                                                   |
|                                                                                 | Resistance towards participation (especially in the beginning) and stigma (-)                                                                                                                                                                |                                                                                                                                                                                                                                                                           |                                                                                                                                                                                                                                                                                                                                                                          |                                                                                                                                                                                                                                                                                                                                                            |                                                                                                                                                   |
|                                                                                 | Mental health policy (MHAP 2005-2010) (+)                                                                                                                                                                                                    | Vision of full citizenship (+)                                                                                                                                                                                                                                            |                                                                                                                                                                                                                                                                                                                                                                          |                                                                                                                                                                                                                                                                                                                                                            |                                                                                                                                                   |
|                                                                                 |                                                                                                                                                                                                                                              | Obligation to evolve in research and innovative practices (+)                                                                                                                                                                                                             | Financial resources (+)                                                                                                                                                                                                                                                                                                                                                  |                                                                                                                                                                                                                                                                                                                                                            |                                                                                                                                                   |
|                                                                                 | Management support in initiating department (+)                                                                                                                                                                                              | Leadership of key actors in executive management /research department (+)                                                                                                                                                                                                 | “Standard-bearers” of full citizenship vision (+)                                                                                                                                                                                                                                                                                                                        |                                                                                                                                                                                                                                                                                                                                                            |                                                                                                                                                   |
|                                                                                 |                                                                                                                                                                                                                                              | Difficulty in sharing the vision (-)                                                                                                                                                                                                                                      | Supportive network (+)                                                                                                                                                                                                                                                                                                                                                   |                                                                                                                                                                                                                                                                                                                                                            |                                                                                                                                                   |
|                                                                                 |                                                                                                                                                                                                                                              | International influence (+)                                                                                                                                                                                                                                               | Shared leadership management/research (+)                                                                                                                                                                                                                                                                                                                                |                                                                                                                                                                                                                                                                                                                                                            | Reform in healthcare system (-)                                                                                                                   |
